# Supplementary material for: A Statistical Analysis of TIR Anomalies extracted by RST in Relation with Earthquake in Sichuan Area with Use of MODIS LST Data
Source: Copernicus journal article supplement (doi:10.5194/nhess-2018-214), 2018-08-16
Supplement: Supplementary file [file nhess-2018-214-AC1-supplement.pdf]

Many thanks for your comments.

The following is my reply for your comments and questions.

Page 1 Line 25: The full names of PPV, FDR, TPR and FNR will be added.

Page 1 Line 35: "outgoing longwave" will be deleted.

Page 2 Line 34: "t no similar" will be corrected, it is "not similar".

Page 3 Fig.1: the names of the main faults will be added, and i will think about adding the overall map of China and Sichuan in this Fig.

Page 4 Line 18: In this study, we used the 560m data.

Page 4 Line 32: What I want to express is that earthquakes caused by human factors, such as housing collapse, will not cause the TIR anomalies, so the earthquakes with depth=0 will be excluded. I will search the related papers online and add the reference, if there is no such papers I will delete this sentence.

Page 6 formula (11) and (12): yes, they are the same. But, they have different meaning. In (5) and (6) the left of these formulas are the final calculated values used for finding the ALICE. And the (11) and (12) is an iterative process, the values will be changed with the iterative process, in other words, the A in formula (11) and (12) are different. If it is necessary I can change the A for A` in formula (11) and (12).

Page 7 Line 14: the reference will be added.

Page 9 Line 3: Period B is 2008.01 to 2018.03, and in Page 9 Line 3, it should be "Period A" not "Period B", I will correct it.

Page 9 Line 9: It is an orange rectangle, I will correct it.

Page 12 Line 31: the standard identification I have shown in chapter 3.3, these rules are quoted form "Long-Term RST analysis of anomalous TIR sequences in relation with earthquakes occurred in Greece in the period 2004-2013".

Page 13 Fig.7 and Fig.8: Sorry for my unclear expression. There is little difference between in the distribution of clouds, but what I want to show is the relationship between the earthquakes distribution and clouds distribution. In period C, many earthquakes happened in the position that always blocked by clouds.

Page 14 Fig.9: Yes I have also read some papers that indicate the TIR anomalies before Wenchuan earthquakes, but may use different data, different method and different identification rules for TIR anomalies. In this paper, I do not mean that there is no TIR anomalies before Wenchuan Earthquake, and I cannot give the results that there is or there is not a TIR anomaly corresponding to some earthquake. This article is only to evaluate and study whether the results extracted by RST with use of MODIS LST data are effective.

Page 16 Line 37: The expression in my paper is unclear. I did not negate the validity of Thermal Infrared for earthquake prediction studies, nor did I negate the validity of this method. I just want to say things based on the results, the prediction ability of RST method and MODIS data in Sichuan area is limited, it may be caused by weather, data, identification of TIR anomalies or others.
